# Supplementary material for: Conformational Modulation of Tissue Transglutaminase via Active Site Thiol Alkylating Agents: Size Does Not Matter
Source: MDPI journal article supplement (doi:10.3390/biom14040496), 2024-04-19
Supplement: s1 [file s1]

## Supplementary Material for:

# Conformational modulation of tissue transglutaminase by active site thiol alkylating agents: size doesn't matter

Pauline Navals<sup>1</sup>, Alana M.M. Rangaswamy<sup>1</sup>, Petr Kasyanchyk<sup>1</sup>, Maxim V. Berezovski<sup>1</sup>, & Jeffrey W. Keillor<sup>1,\*</sup>

<sup>1</sup>Department of Chemistry and Biomolecular Sciences,  
University of Ottawa, Ottawa, Ontario K1N 6N5 Canada\*  
Corresponding author: jkeillor@uottawa.ca

### *Table of contents*

|                                                                  |           |
|------------------------------------------------------------------|-----------|
| <b>1. Synthesis .....</b>                                        | <b>2</b>  |
| <b>2. NMR Spectra.....</b>                                       | <b>6</b>  |
| <b>3. HPLC data .....</b>                                        | <b>14</b> |
| <b>4. Native PAGE original stained gels.....</b>                 | <b>21</b> |
| <b>5. Capillary electrophoresis full electropherograms .....</b> | <b>22</b> |
| <b>6. Kinetic data fitting .....</b>                             | <b>28</b> |
| <b>References.....</b>                                           | <b>31</b> |

## 1. Synthesis

**N-2-[4-[[1-Adamantanecarbonyl]-1-piperazinyl]-2-oxoethyl] N-[2-oxo-2-(piperazin-1-yl)ethyl]carbamate (1)** was synthesized as previously described [34].

**tert-butyl 4-[2-(prop-2-enamido)acetyl]piperazine-1-carboxylate (2).** Compound **9** (0.15 g, 0.8 mmol, 1.1 eq), DCC (0.17 g, 0.8 mmol, 1.1 eq) and DMAP (0.096 mg, 0.08 mmol, 0.1 eq) were dissolved in ACN at room temperature, under N<sub>2</sub>. After a few minutes a white precipitate formed and Boc-piperazine (0.14 g, 0.74 mmol, 1 eq) was added. The reaction was monitored by TLC (DCM/MeOH, 95/5) and stirred at room temperature overnight. Dicyclohexylurea (DCU) was then filtered out and ACN was then evaporated. The resulting yellow oil was then dissolved in AcOEt (5 mL) and was subsequently washed with AcOH 5% (3 × 5 mL), brine (2 ×), saturated NaHCO<sub>3</sub> (3 × 5 mL) and brine again (3 × 5 mL) before being dried over anhydrous MgSO<sub>4</sub>, filtered and concentrated. The product was then washed with cold Et<sub>2</sub>O, and the resulting white powder was isolated in a 30% yield. **<sup>1</sup>H-NMR (CDCl<sub>3</sub>, 300 MHz):** 1.48 (9H, s), 3.45 (6H, m), 3.63 (2H, m), 4.15 (2H, d, J=4.13 Hz), 5.69 (1H, dd, J=3.90 Hz), 6.19 (1H, dd, J=9.00 Hz), 6.32 (1H, dd, J=6.25 Hz), 6.69 (1H, s). **<sup>13</sup>C-NMR (CDCl<sub>3</sub>, 101 MHz):** 28.36, 33.97, 41.34, 41.92, 44.29, 80.62, 126.96, 130.32, 148.80, 154.6, 165.6. **HRMS-EI:** [M]<sup>+</sup> = calculated 297.1689 found 297.1655.

**N-[2-(4-acetyl)piperazin-1-yl]-2-oxoethyl]prop-2-enamide (3).** Compound **13** (0.19 g, 0.69 mmol, 1 eq) and Pd/C (0.02 g, 10% w) were suspended in freshly dried MeOH (7 mL) under N<sub>2</sub> atmosphere, then NaBH<sub>4</sub> (0.05 g, 0.66 mmol, 2 eq) was added portion wise to control the emulsion. The reaction was stirred until completion, about 3 h (TLC DCM/MeOH, 95/5). The reaction was quenched with water and the azeotrope H<sub>2</sub>O/MeOH was evaporated followed by filtration through celite of the Pd. Then, the crude product (0.1 g, 0.6 mmol, 1 eq) was directly dissolved in dry DCM (5 mL) under N<sub>2</sub> atmosphere and DIPEA (0.3 mL, 1.8 mmol, 3 eq) was added. The mixture was cooled down to 0°C and acryloyl chloride (0.05 mL, 0.66 mmol, 1.1 eq) was added dropwise. The reaction was stirred at 0°C under N<sub>2</sub> until completion, about 1 h (TLC: DCM/MeOH 98%/2%). The DCM was then evaporated, and the crude oil was directly subjected to normal phase flash chromatography (DCM/MeOH, 0 to 10% MeOH) followed by reverse phase chromatography (H<sub>2</sub>O + 0.01% TFA/ACN, 10 to 70% ACN). The desired product was isolated in a 5.5% overall yield. **<sup>1</sup>H-NMR (D<sub>2</sub>O, 300 MHz):** 2.13 (3H, s), 3.62 (8H, m, J=4.17 Hz), 4.21 (2H, s), 5.78 (1H, dd, J=3.82 Hz), 6.21 (1H, dd, J=6.12 Hz), 6.33 (1H, q, J=9.13 Hz). **<sup>13</sup>C-NMR (D<sub>2</sub>O, 101 MHz):** 20.34, 40.95, 41.08, 41.22,

41.85, 43.87, 44.16, 45.45, 127.98, 129.36, 168.89, 172.81. **HRMS-ESI**  $[MNa]^+$  = calculated 262.1170 found 262.1168.

**Adamantane-1-carboxylpiperazin-1-yl-prop-2-en-1-one (4).** Compound **10** (0.125 g, 0.44 mmol, 1 eq) was suspended in DCM (2 mL) under  $N_2$  and DIPEA (0.230 mL, 1.32 mmol, 3 eq) was added. To the now homogenous mixture was added acryloyl chloride (0.039 mL, 0.48 mmol, 1.1 eq), dropwise. The mixture was stirred at room temperature until completion (about 30 min), as determined by TLC (MeOH/DCM, 2% / 98%, visualized with ninhydrin). The solvent was then evaporated, and the residue was dissolved in EtOAc. This organic layer was then washed with AcOH 5% (3  $\times$  10 mL), brine (1  $\times$  10 mL), saturated  $NaHCO_3$  (3  $\times$  10 mL) and brine again (1  $\times$  10 mL), before being dried over anhydrous  $MgSO_4$ , filtered, and concentrated resulting in a pure white powder (48%).  **$^1H$ -NMR ( $CDCl_3$ , 400 MHz):** 1.73 (1H, d,  $J=2.19$  Hz), 2.00 (1H, d,  $J=2.82$  Hz), 2.06 (1H, d,  $J=0.00$  Hz), 3.56 (1H, d,  $J=0.00$  Hz), 3.70 (1H, d,  $J=0.00$  Hz), 5.74 (1H, q,  $J=4.12$  Hz), 6.32 (1H, dd,  $J=1.94, 16.79$  Hz), 6.35 (1H, d,  $J=1.95$  Hz), 6.56 (1H, ddd,  $J=10.41, 16.81, 0.00$  Hz), 6.59 (1H, d,  $J=10.38$  Hz).  **$^{13}C$ -NMR ( $CDCl_3$ , 101 MHz):** 28.41, 36.57, 39.08, 41.78, 45.87, 127.09, 128.56, 165.61, 176.11. **HRMS-EI:**  $[M]^+$  = calculated 302.1994 found 302.1991.

**N-[2-(morpholin-4-yl)-2-oxoethyl]prop-2-enamide (5).** Compound **9** (0.15 g, 1.6 mmol, 1 eq), morpholine (0.182 mL, 2.11 mmol, 1.3 eq) and NMI (0.453 mL, 5.67 mmol, 3.5 eq) were dissolved in ACN at room temperature and under nitrogen. Then, Chloro-N,N,N',N'-tetramethylformamidinium hexafluorophosphate (TCHF, 0.544 g, 1.94 mmol, 1.2 eq) was added and the reaction was stirred overnight (TLC: MeOH/DCM, 8/92, completion was not reached). ACN was then evaporated, and the resulting mixture was dissolved in AcOEt and washed with AcOH 5% (3 times), brine (once), saturated  $NaHCO_3$  (3 times) and brine again. The resulting aqueous phase was then extracted three times with AcOEt. The resulting yellow oil was then purified by flash chromatography (MeOH/ DCM, gradient 0 to 8% MeOH).  **$^1H$ -NMR ( $CDCl_3$ , 300 MHz):** 3.43 (2H, t,  $J=4.87$  Hz), 3.67 (6H, m), 4.12 (2H, d,  $J=4.14$  Hz), 5.66 (1H, dd,  $J=3.91$  Hz), 6.18 (1H, q,  $J=8.97$  Hz), 6.30 (1H, dd,  $J=6.29$  Hz), 6.76 (1H, s).  **$^{13}C$ -NMR ( $CDCl_3$ , 101 MHz):** 41.15, 42.31, 44.81, 66.31, 66.65, 126.88, 130.32, 165.36, 166.58. **HRMS-EI:**  $M^+$  = calculated 198.1004 found 198.1016.

**N-(carbamoylmethyl)prop-2-enamide (6).** Glycinamide (0.25 g, 2.25 mmol, 1 eq) and  $K_2CO_3$  (0.625 g, 4.5 mmol, 2 eq) were dissolved in MilliQ  $H_2O$  (15 mL) then cooled to about 5°C. Then acryloyl chloride in Et<sub>2</sub>O (0.2 mL, 2.45 mmol, 1.1 eq) was added very slowly over 25 min. The reaction was warmed up to room

temperature and stirred for 90 min until completion (DCM/MeOH, 95/5). The solvents were evaporated, and acetone (minimal amount) was added to the mixture to precipitate K<sub>2</sub>CO<sub>3</sub>. After filtration, the acetone solution was used to recrystallize the desired product into white crystals with a yield of 55%. The spectral data match those reported in the literature [44].

**2-(prop-2-enamido)acetic acid (9).** Glycine *tert*-butyl ester hydrochloride (2.5 g, 15 mmol, 1 eq) and DIPEA (5.2 mL, 30 mmol, 2 eq) were dissolved in dry DCM under N<sub>2</sub> and cooled to 0°C. Acryloyl chloride (1.4 mL, 17 mmol, 1.1 eq) was added dropwise slowly. The reaction was then stirred at room temperature until completion (TLC eluant DCM: MeOH 98:2), about 30 min. DCM was evaporated, and the residue was then dissolved in AcOEt (50 mL). This organic layer was washed with AcOH 5% (3 × 50 mL), brine (3 × 50 mL), saturated NaHCO<sub>3</sub> (3 × 50 mL) and brine again (3 × 50 mL) before being dried over anhydrous MgSO<sub>4</sub>, filtered and concentrated. The resulting crude yellow oil was directly dissolved in neat TFA (20 mL) and stirred at room temperature until completion (TLC eluant DCM: MeOH, 98:2, 60 min). TFA was then evaporated and co-evaporated with DCM 5 times. The resulting oil was dissolved in cold Et<sub>2</sub>O, resulting in formation of a white powder with an overall yield of 50%. The characterization matches the literature [45].

**N-(Adamantanecarbonyl)piperazine hydrochloride (10)** was synthesized as previously described [34].

**2-Amino-1-[4-(1-adamantanecarbonyl)-1-piperazinyl]ethenone hydrochloride (11)** was synthesized as previously described [34].

**Benzyl N-[2-oxo-2-(piperazin-1-yl)ethyl]carbamate hydrochloride (12).** Cbz-Gly-OH (1 g, 4.8 mmol, 1.1 eq), Boc-piperazine (0.81 g, 4.4 mmol, 1 eq), HATU (2.65 g, 7 mmol, 1.6 eq) and DIPEA (2.3 mL, 13.2 mmol, 3 eq) were dissolved in dry DCM (20 mL) and the reaction was monitored by TLC (DCM/MeOH, 98/2) and stirred at room temperature overnight. The solvent was then evaporated, and the resulting orange oil was dissolved in EtOAc (50 mL). The resulting organic phase was washed with HOAc 5% (3 × 50 mL), followed by one wash with brine, then saturated NaHCO<sub>3</sub> (3 × 50 mL) and brine again (3 × 50 mL). The organic layer was then dried over anhydrous MgSO<sub>4</sub>, filtered and concentrated. The resulting orange oil was directly dissolved in a mixture of HCl (4 M)/dioxane and DCM (1:1, 20 mL) and the reaction was stirred at room temperature until completion (followed by TLC, DCM/MeOH, 98/2, 3.5 h). The solvents were then evaporated, and the resulting powder was washed with cold Et<sub>2</sub>O. The desired product was obtained

in an overall yield of 85% as a slightly pink colored powder. The characterization matches the literature [46].

**Benzyl N-[2-(4-acetylpiperazin-1-yl)-2-oxethyl]carbamate (13).**

Compound **12** (0.5 g, 1.6 mmol, 1 eq) was suspended in DCM under N<sub>2</sub> atmosphere and TEA (0.67 mL, 4.8 mmol, 3 eq) and the mixture was cooled at 0°C. Acetyl chloride (0.17 mL, 2.4 mmol, 1.5 eq) was added slowly over 15 min. The reaction was then warmed up to room temperature and stirred until completion, about 6 h (TLC: DCM/MeOH, 95/5). The DCM was then evaporated, and the resulting oil was dissolved in Me-THF (20 mL) and washed with AcOH 5% (3 × 20 mL) and brine (3 × 20 mL). TLC showed that most of the compound stays in the aqueous layer, which was then re-extracted with Me-THF (3 × 20 mL) and AcOEt (3 × 20 mL). The desired product was then directly used to prepare compound **3**.

## 2. NMR Spectra

### Inhibitor 2

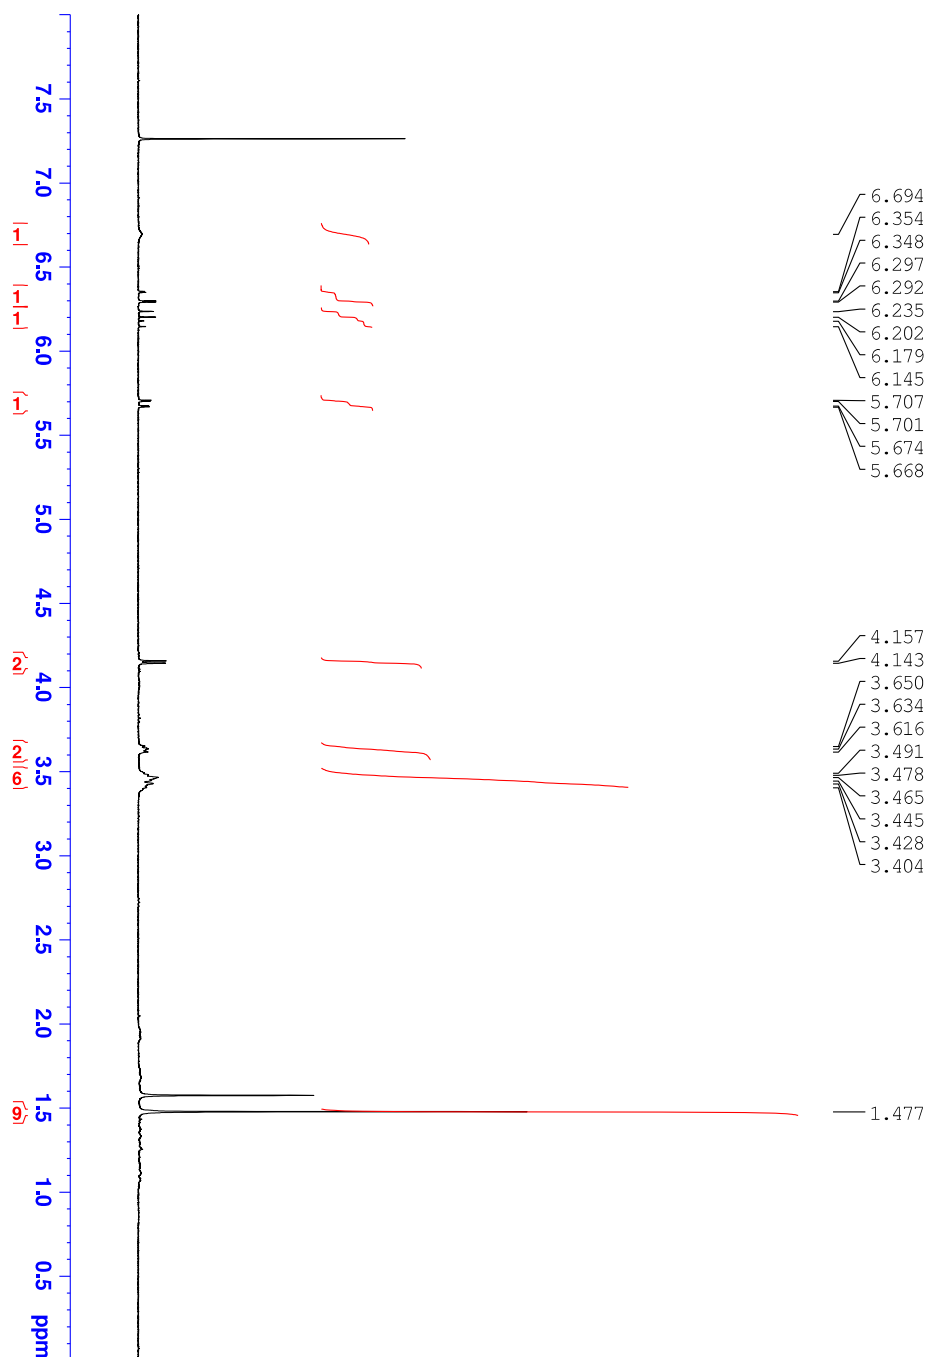

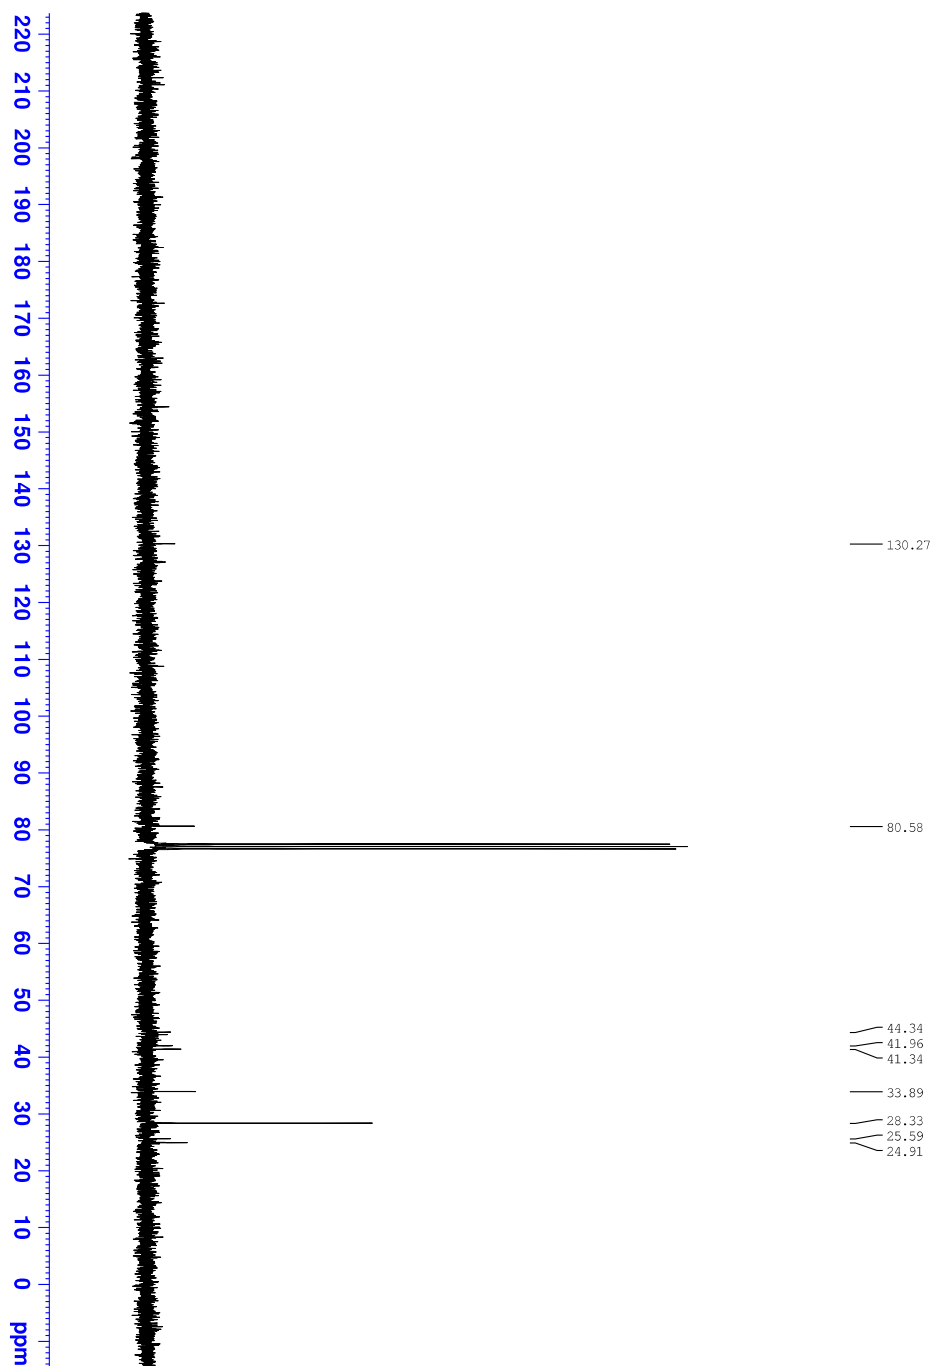

# *Inhibitor 3*

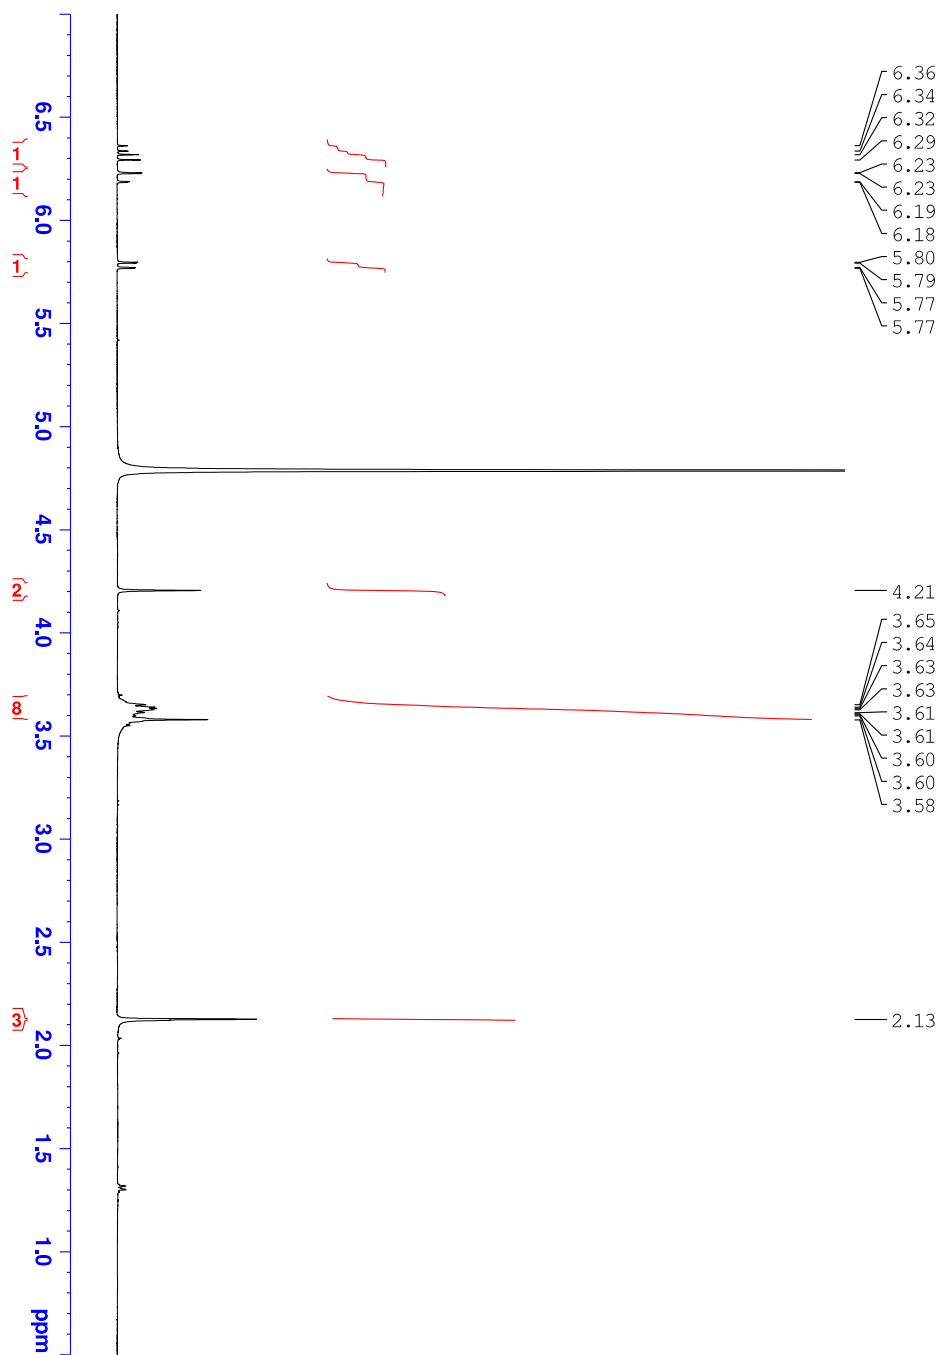



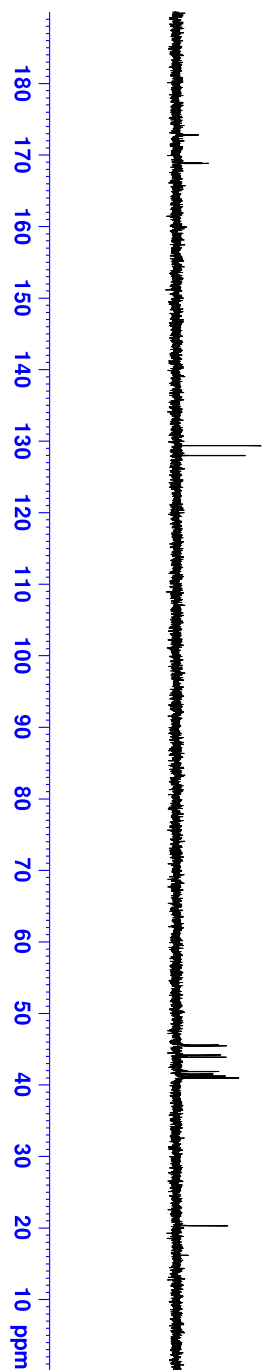

172.83  
172.78  
168.95  
168.91  
168.82

129.36  
127.98

45.57  
45.45  
44.16  
43.87  
41.85  
41.52  
41.22  
41.08  
40.95

20.34  
20.28

*Inhibitor 4*

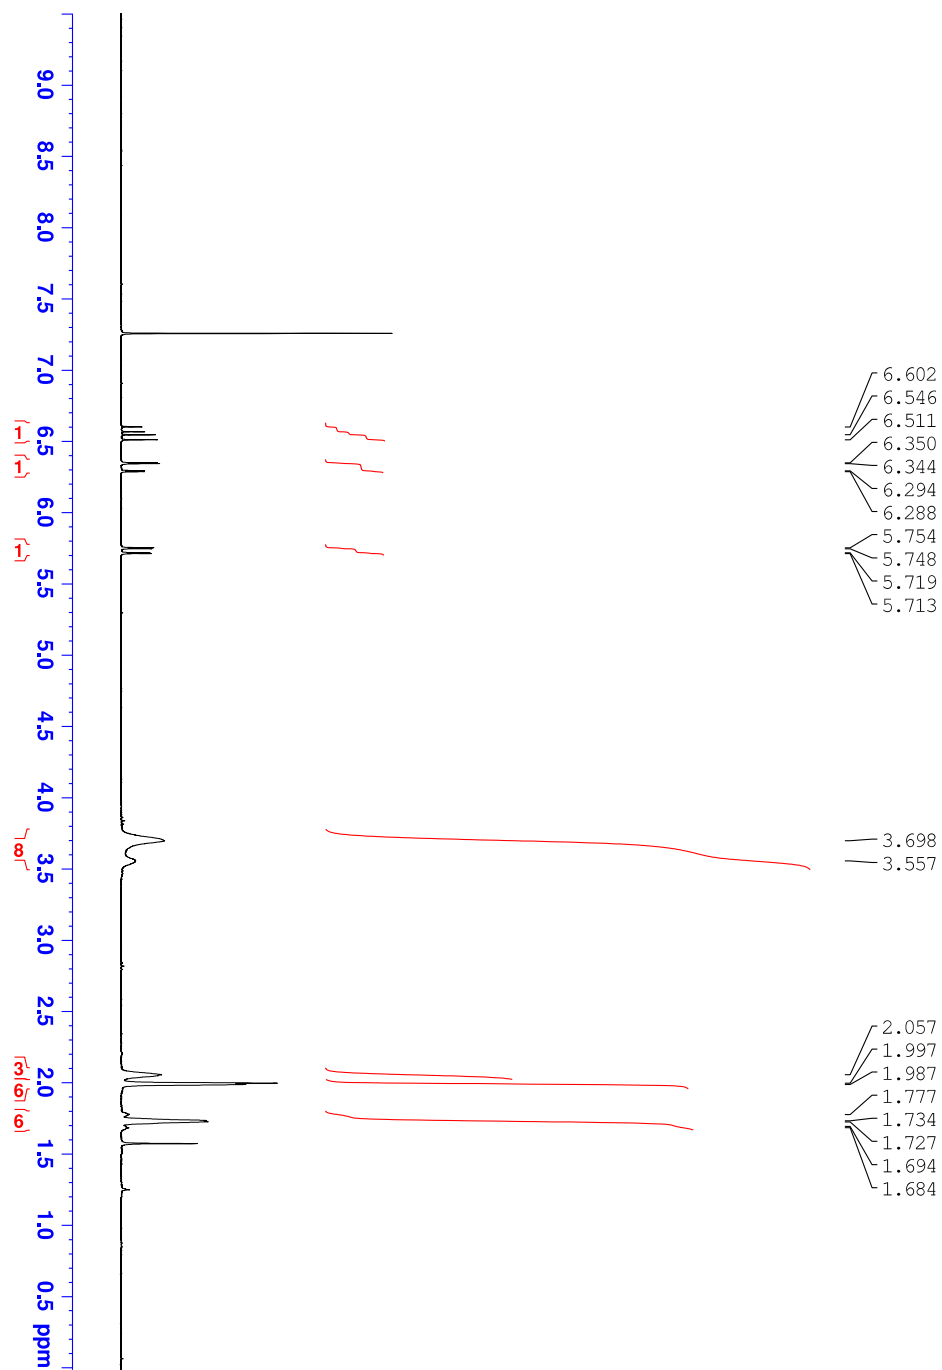

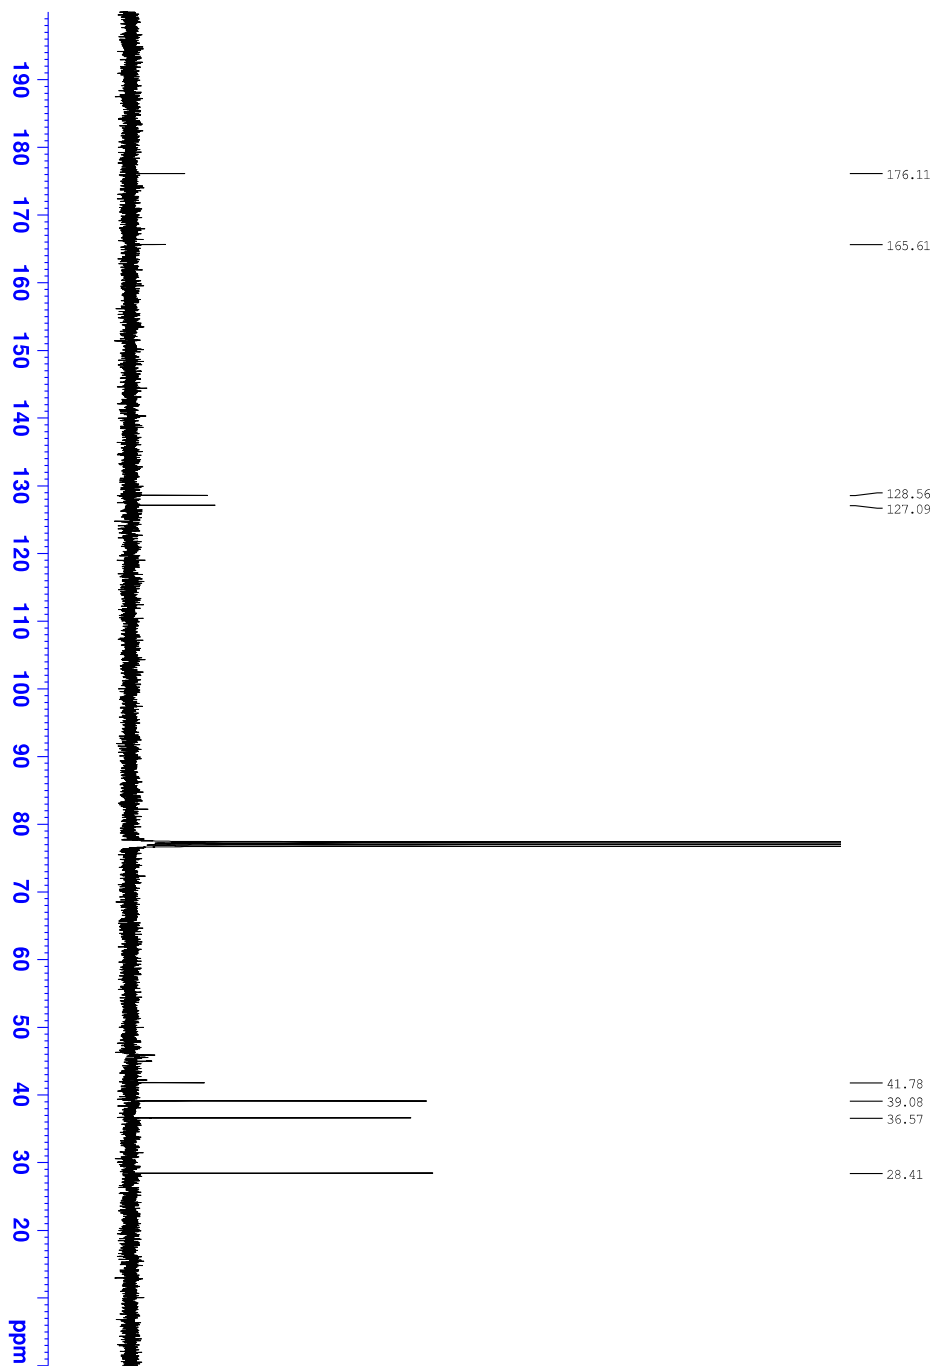

*Inhibitor 5*

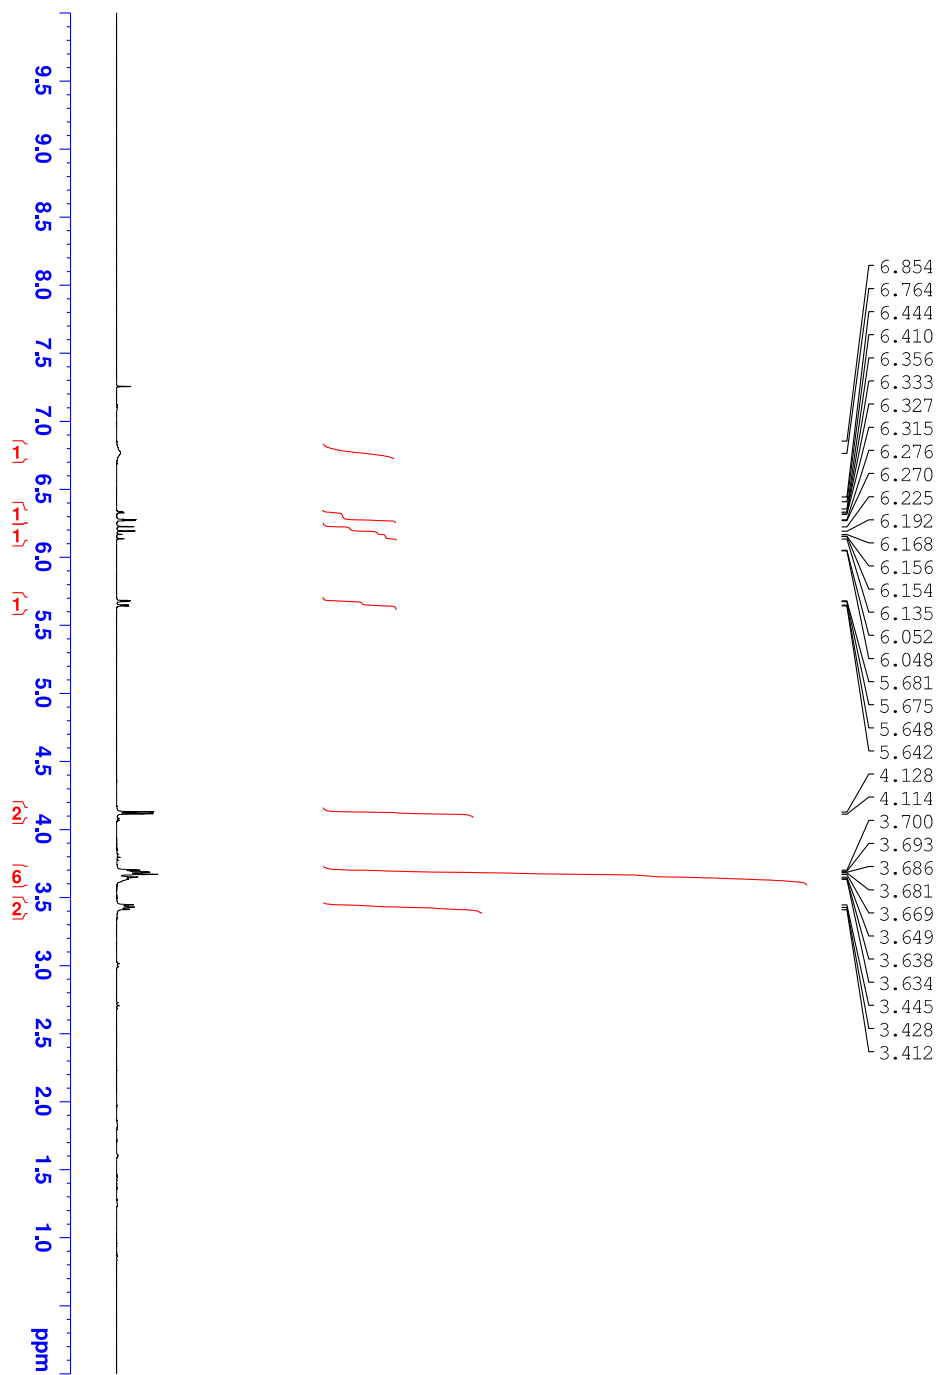

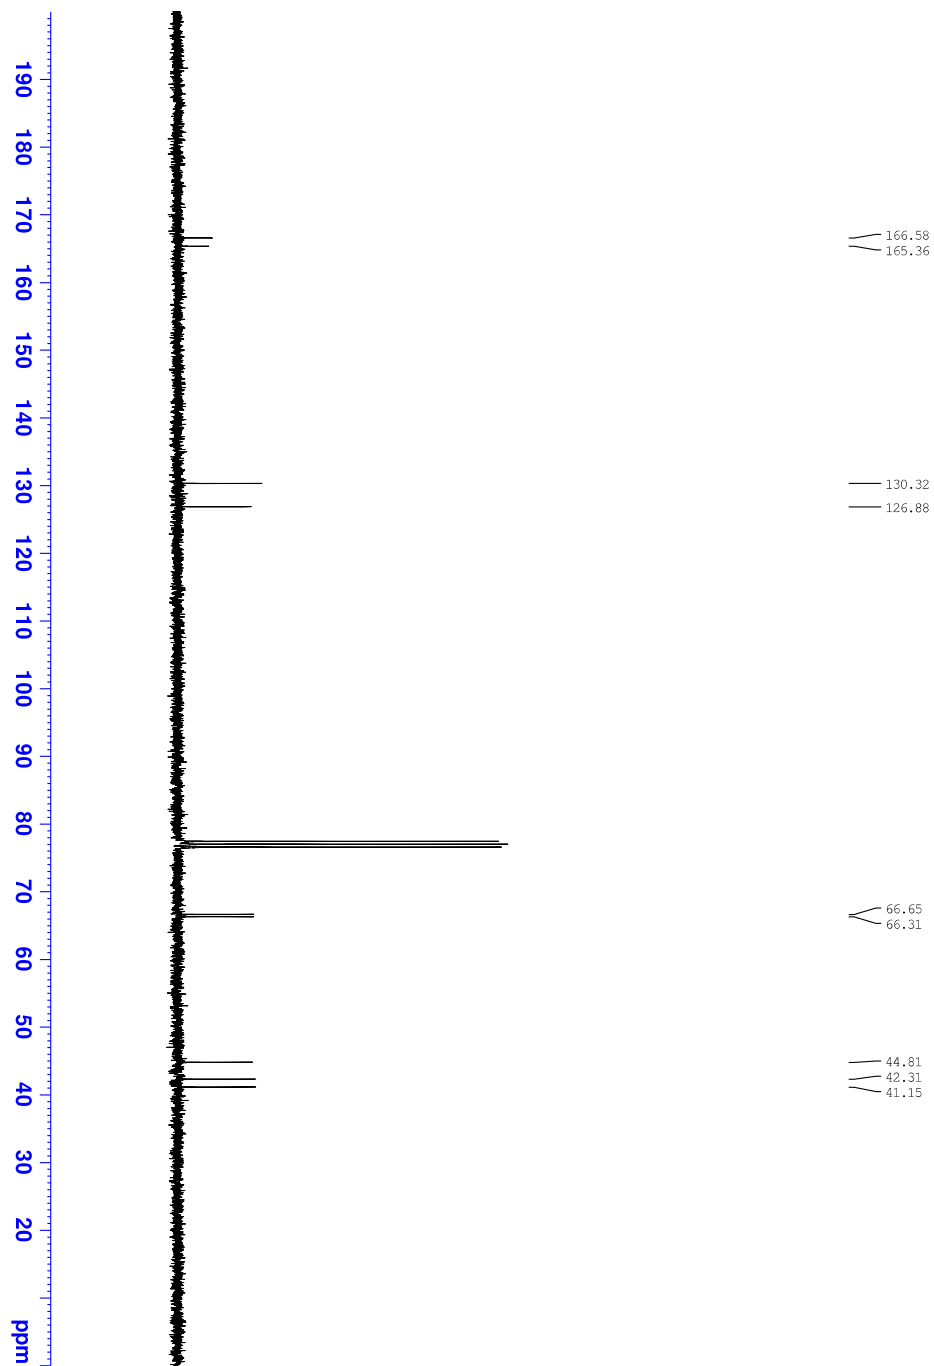

### 3. HPLC data

The purity of the final inhibitors was determined by high performance liquid chromatography (HPLC, Gilson-Mandel GXP271). UV detection was performed at 214 and 254 nm (Phenomenex Luna, 150 mm × 4.6 mm) according to two methods:

Method one :10-70% acetonitrile in H<sub>2</sub>O + 0.1% TFA, 1mL/min

Method two: 2-25% acetonitrile in H<sub>2</sub>O + 0.1% TFA, 1mL/min

**Table S1:** HPLC purity data for synthesized inhibitor 1 to 6

| Compound              | Retention time (min) | Relative purity (%) |
|-----------------------|----------------------|---------------------|
| <b>1</b> <sup>*</sup> | 16.1                 | 96.3                |
| <b>2</b> <sup>a</sup> | 10.60                | 96.8                |
| <b>3</b> <sup>b</sup> | 2.092                | 98.8                |
| <b>4</b> <sup>a</sup> | 15.70                | 96.1                |
| <b>5</b> <sup>b</sup> | 2.26                 | 97.1                |
| <b>6</b> <sup>b</sup> | 1.50                 | 99.4                |

\* From previous study (*RSC Med. Chem.*, **2022**, 13, 413-428)

<sup>a</sup> method 1

<sup>b</sup> method 2

Inhibitor 1

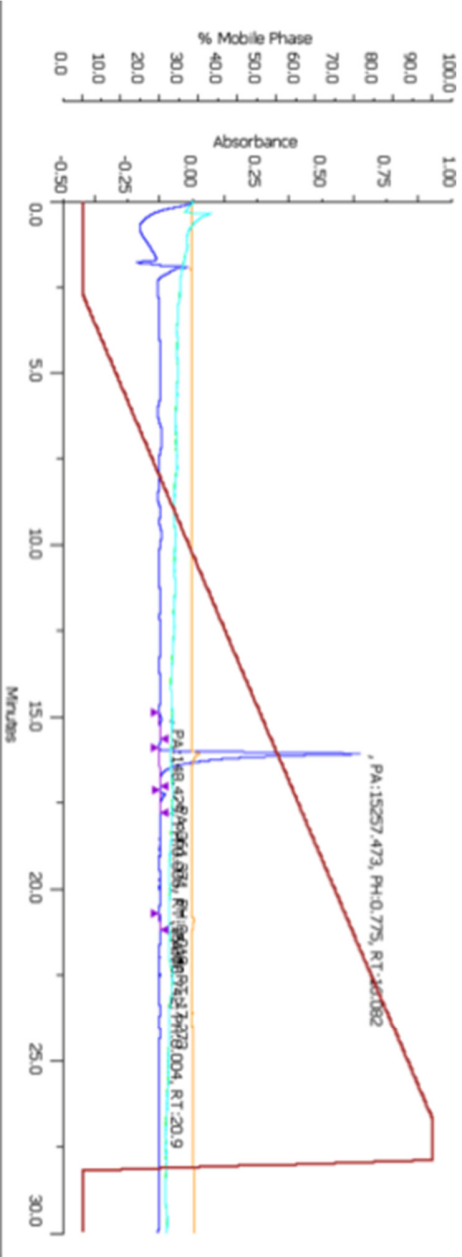

| Sample Table     |           |                      |                             |             |             |                  |        |
|------------------|-----------|----------------------|-----------------------------|-------------|-------------|------------------|--------|
| Injection Number | Peak Name | Retention Time (min) | Area (arbitrary units x100) | Height (AU) | Sample Name | Sample Location  | Area % |
| 4                | 1         | 16.082               | 15357.4729                  | 0.775       | AQ2-42      | Sample Zone->153 | 96.298 |
| 4                | 2         | 17.273               | 361.3712                    | 0.079       | AQ2-42      | Sample Zone->153 | 2.281  |
| 4                | 3         | 20.9                 | 76.7417                     | 0.004       | AQ2-42      | Sample Zone->153 | 0.484  |
| 4                | 4         | 15.066               | 148.4287                    | 0.006       | AQ2-42      | Sample Zone->153 | 0.937  |

Inhibitor 2

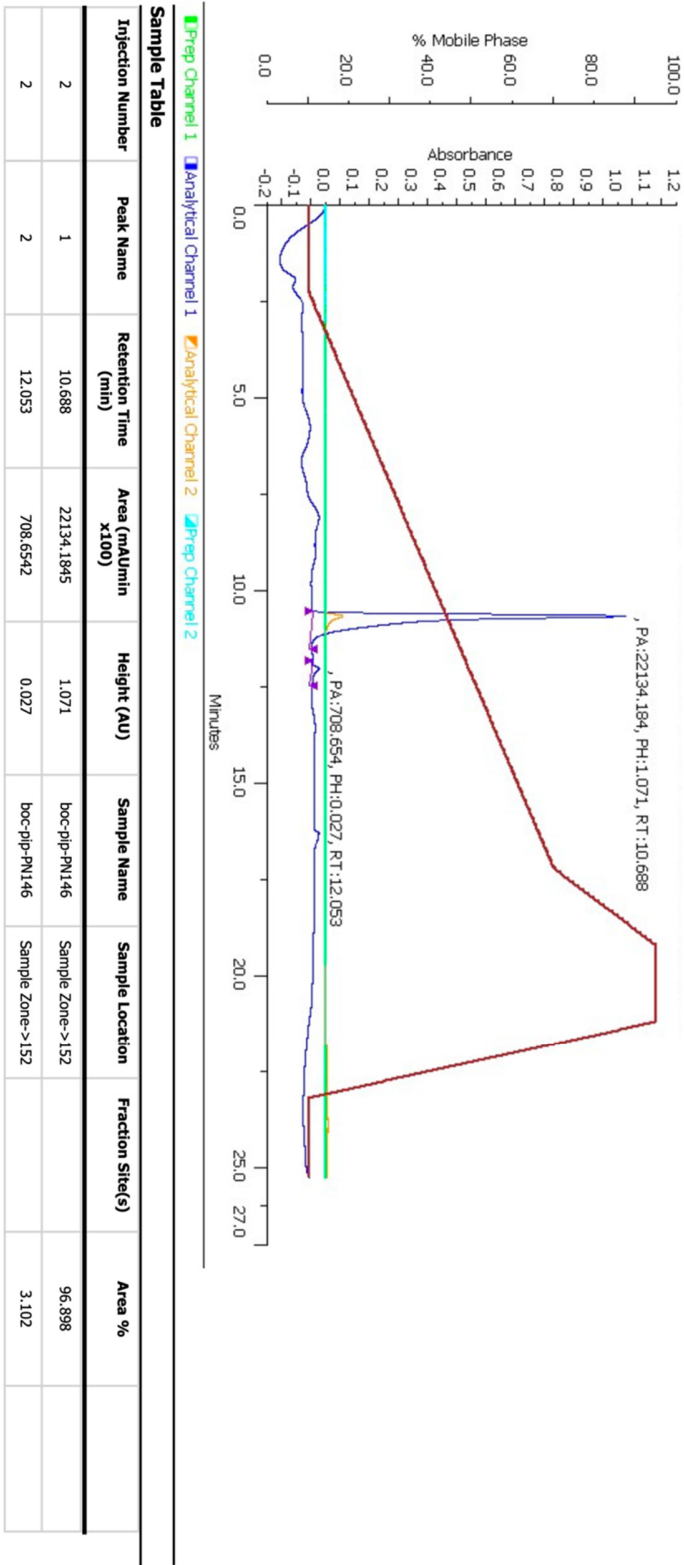



Inhibitor 3

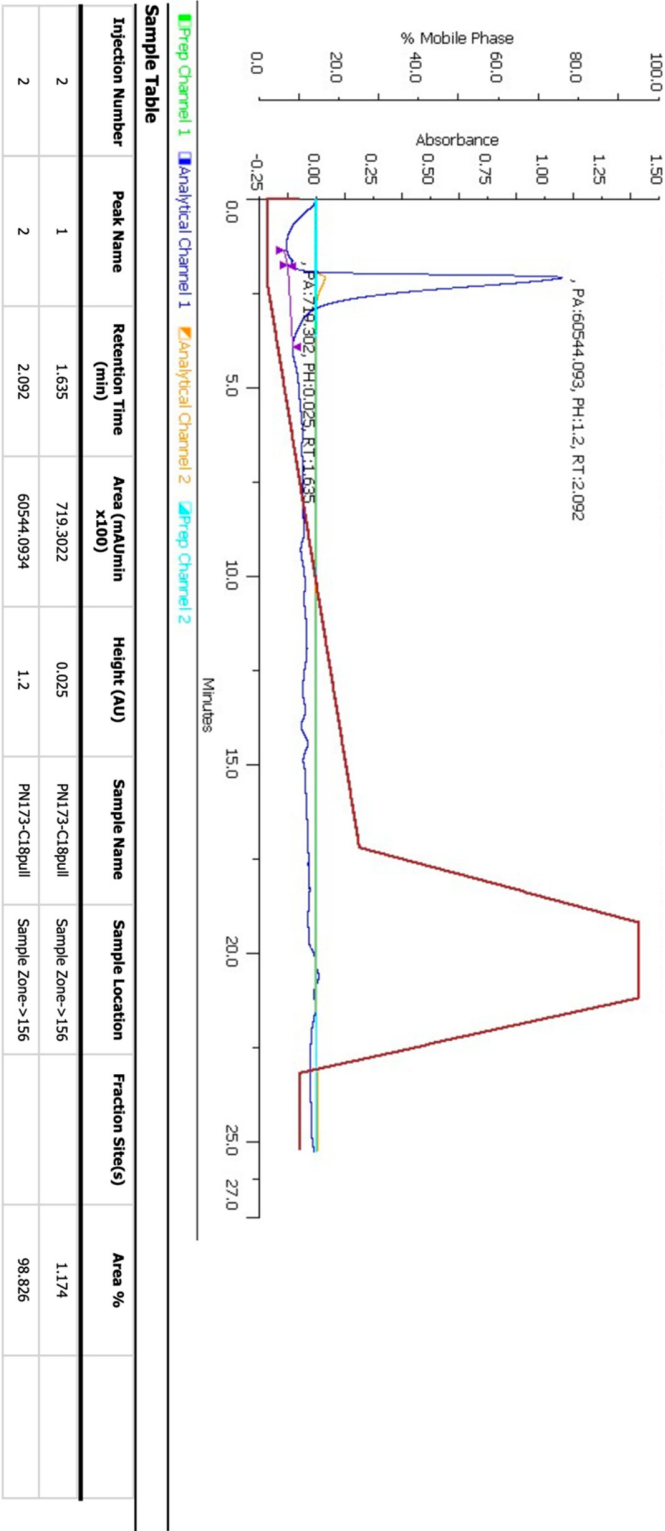

Inhibitor 4

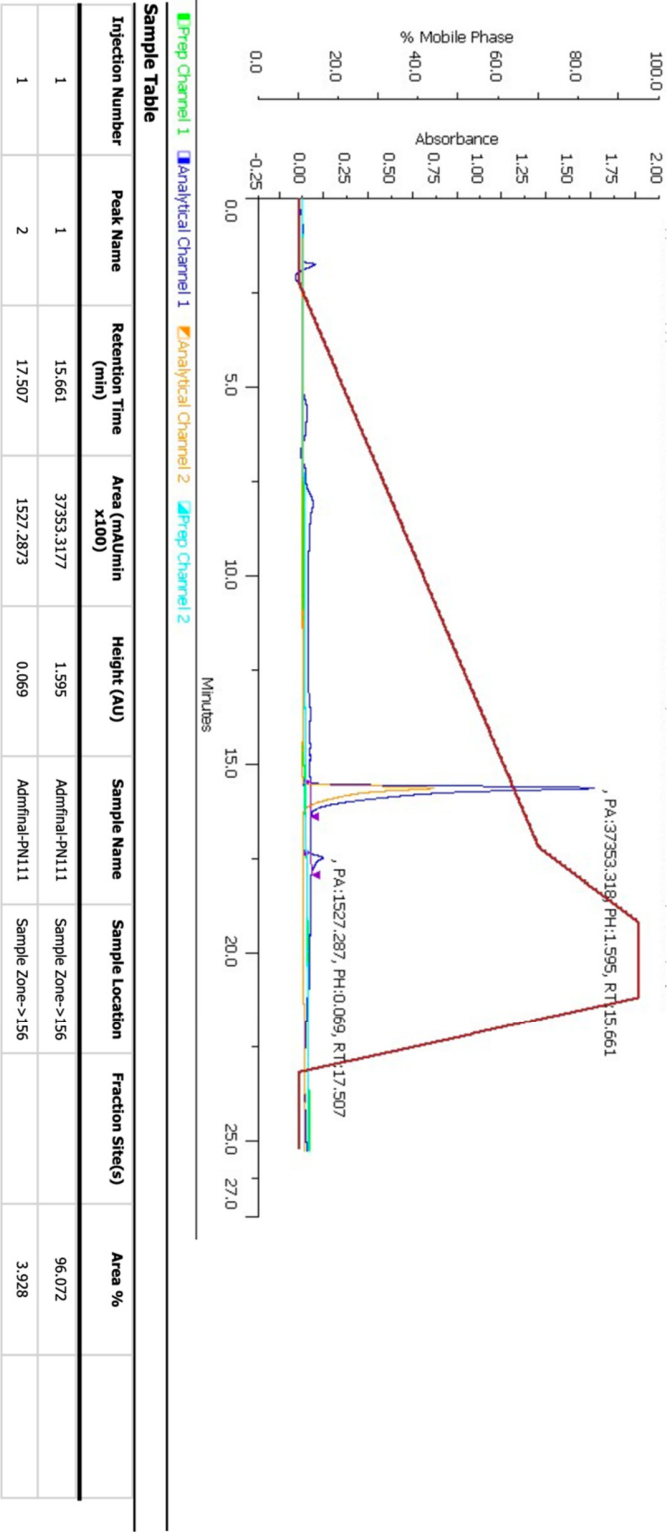

Inhibitor 5

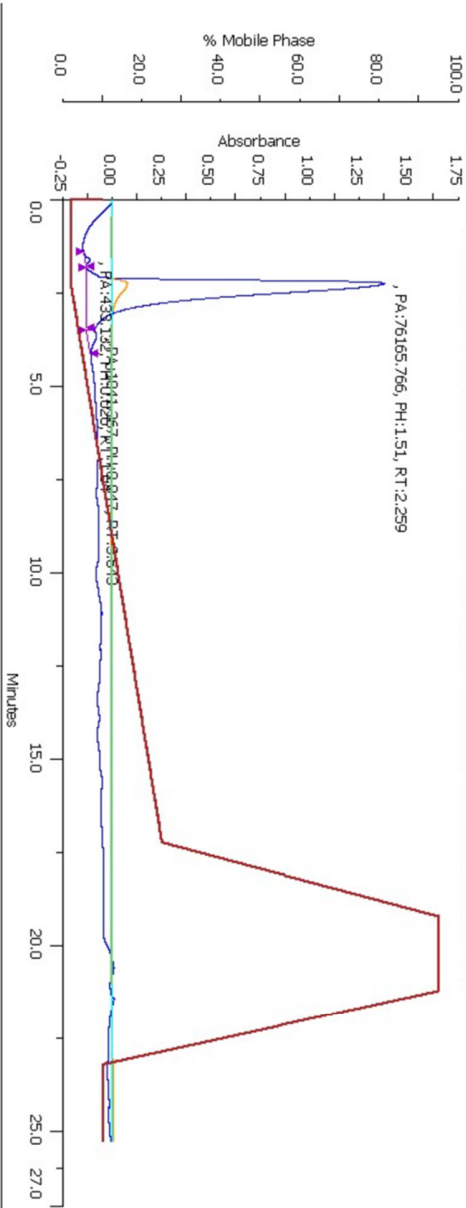

| Sample Table     |           |                      |                    |             |             |                  |
|------------------|-----------|----------------------|--------------------|-------------|-------------|------------------|
| Injection Number | Peak Name | Retention Time (min) | Area (mAUmin x100) | Height (AU) | Sample Name | Sample Location  |
| 2                | 1         | 1.64                 | 433.1321           | 0.026       | PN-150      | Sample Zone->162 |
| 2                | 2         | 2.259                | 76165.766          | 1.51        | PN-150      | Sample Zone->162 |
| 2                | 3         | 3.643                | 1841.3668          | 0.047       | PN-150      | Sample Zone->162 |

| Fraction Site(s) | Area % |
|------------------|--------|
|                  | 0.552  |
|                  | 97.1   |
|                  | 2.347  |

Inhibitor 6

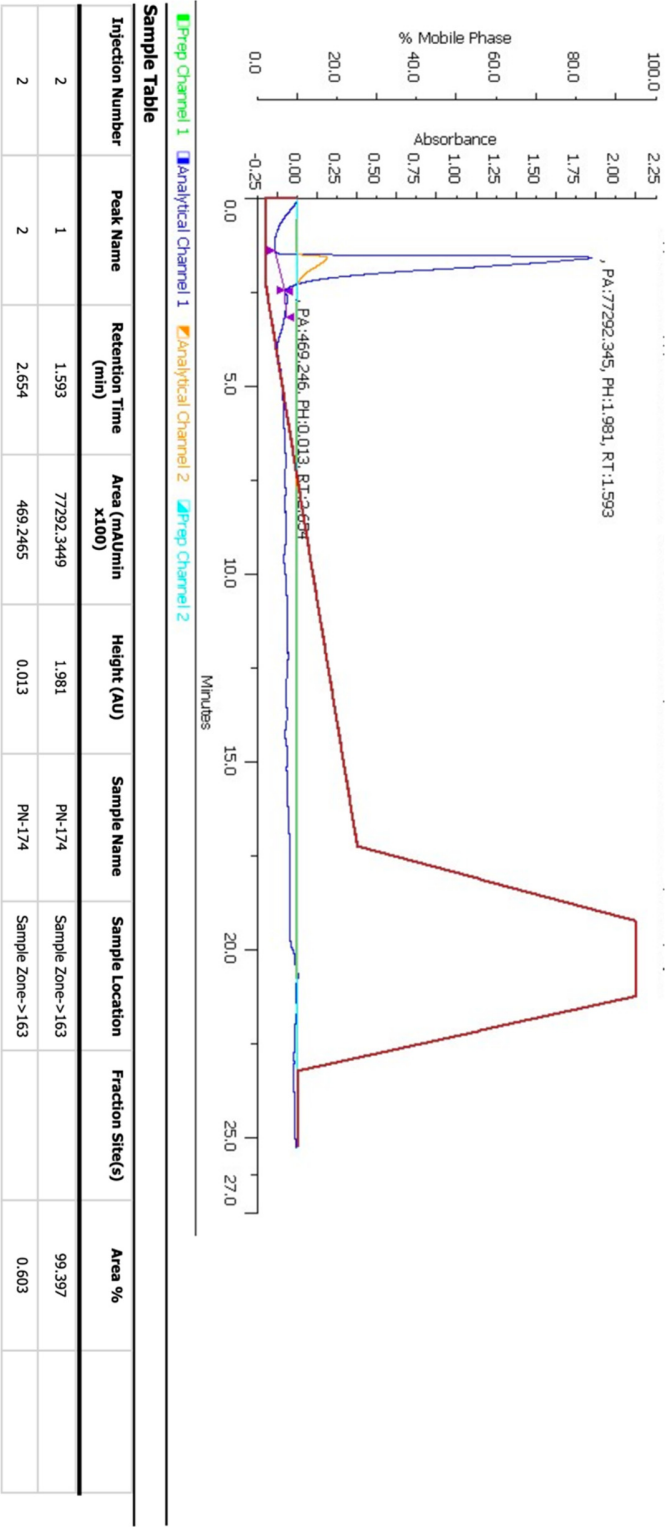

#### 4. Native PAGE original stained gels

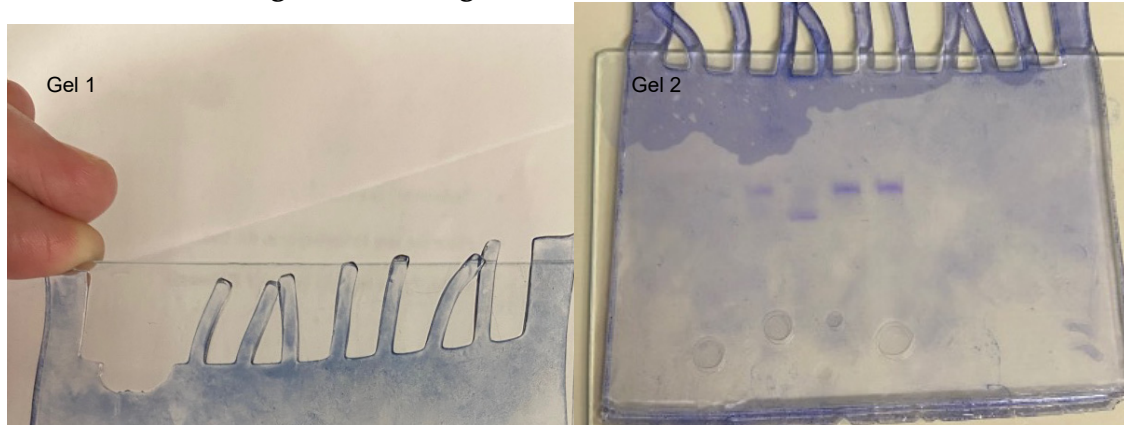

**Figure S1:** Original images of the full-length native PAGE gels. Gel 1: Controls (lanes 1 to 3) + inhibitor VA4, 1, 5, 7, 8 and Iodoacetamide (lanes 4 to 9). Gel 2: Controls (lanes 3 and 4) and iodoacetamide (5 eq and 10 eq, lanes 5 and 6).

## 5. Capillary electrophoresis full electropherograms

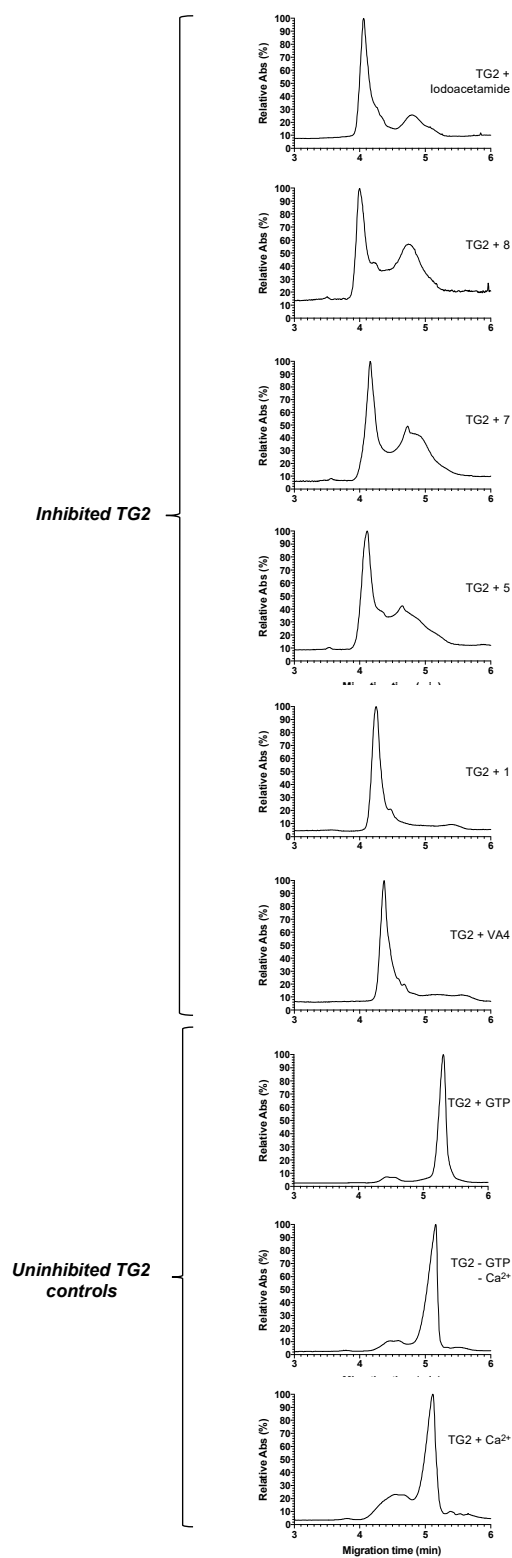

**Figure S2:** KCE electropherograms of comparative analysis of all analytes.

Control 1: TG2 +  $\text{Ca}^{2+}$

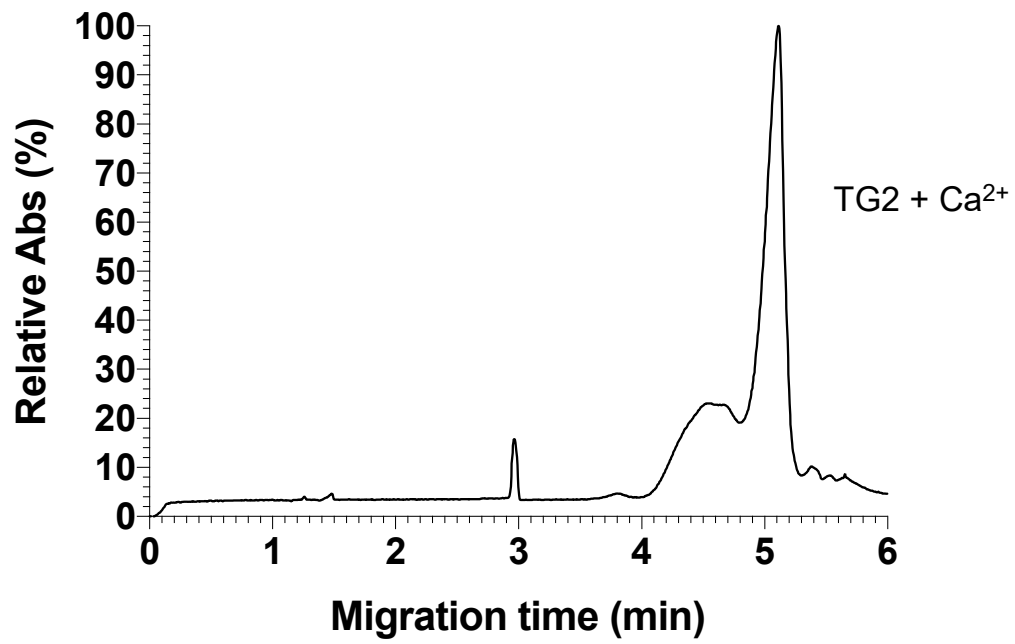

Control 2: TG2 -GTP and - $\text{Ca}^{2+}$

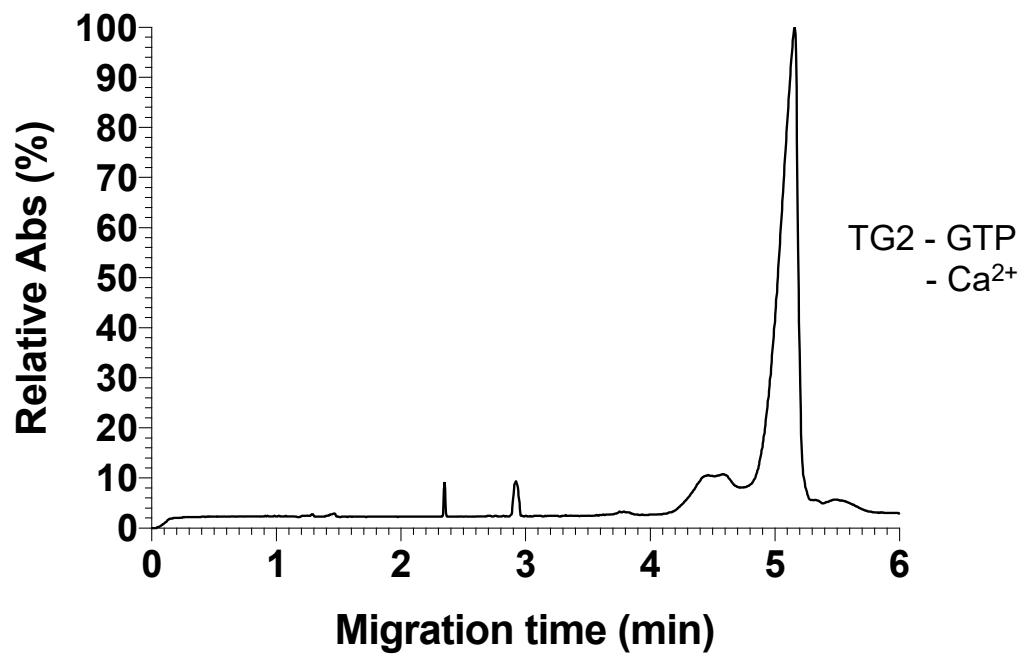

Control 3: TG2 + GTP

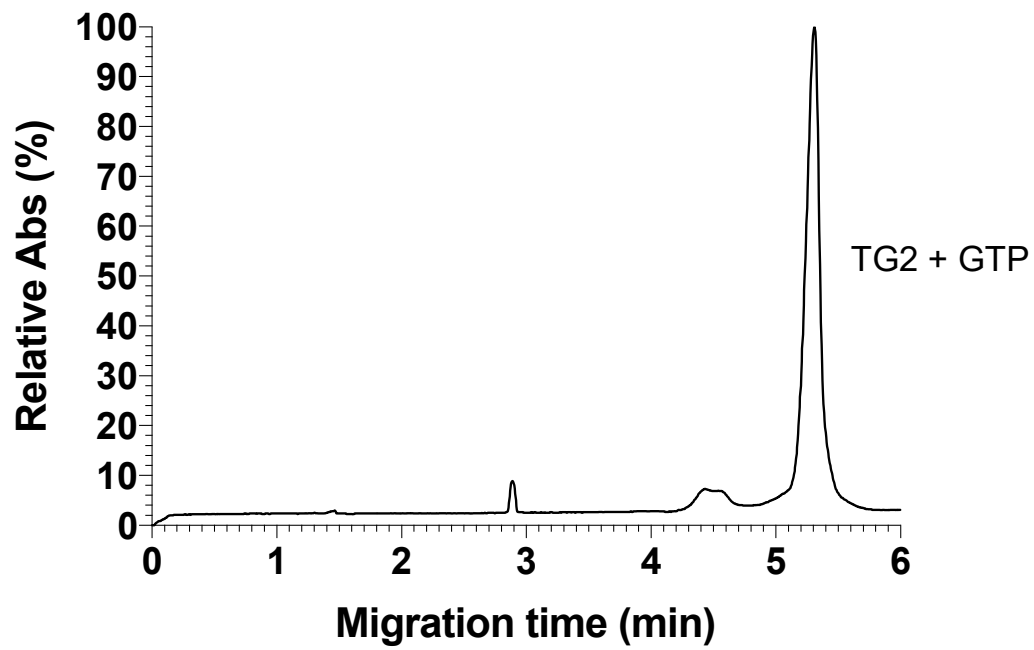

TG2 + inhibitor VA4

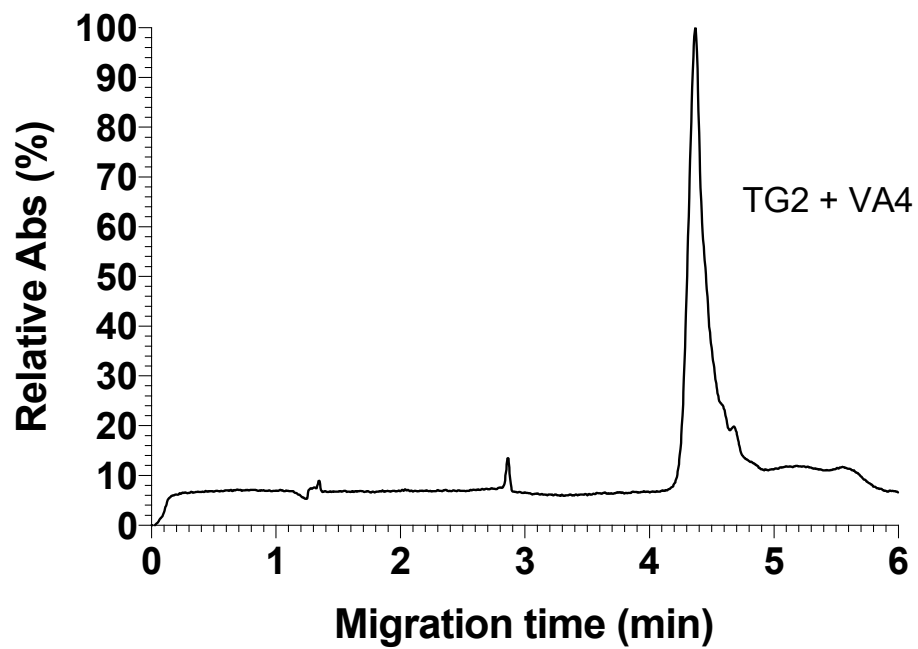



*TG2 + inhibitor 1*

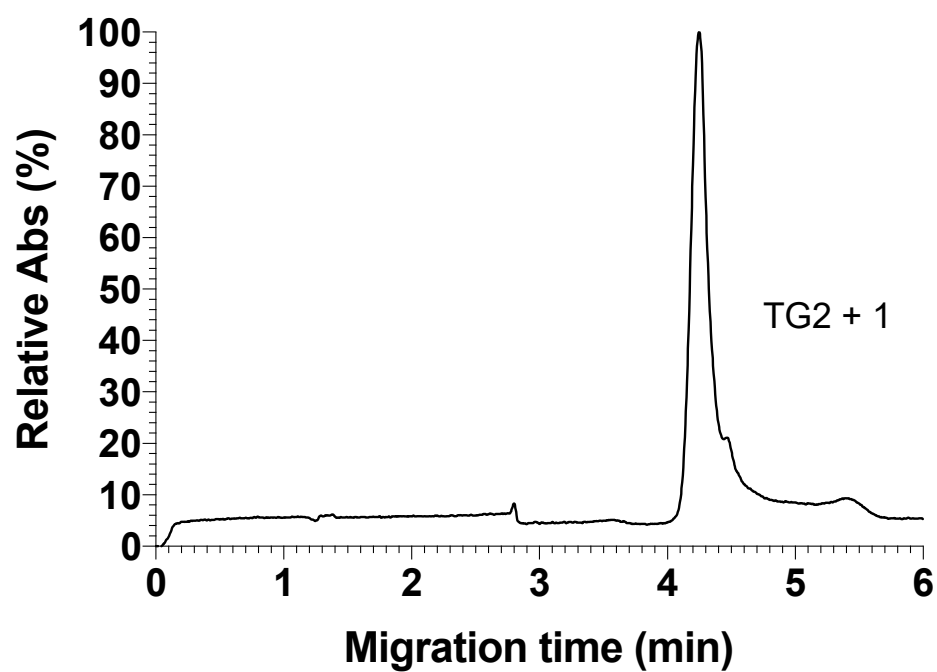

*TG2 + inhibitor 5*

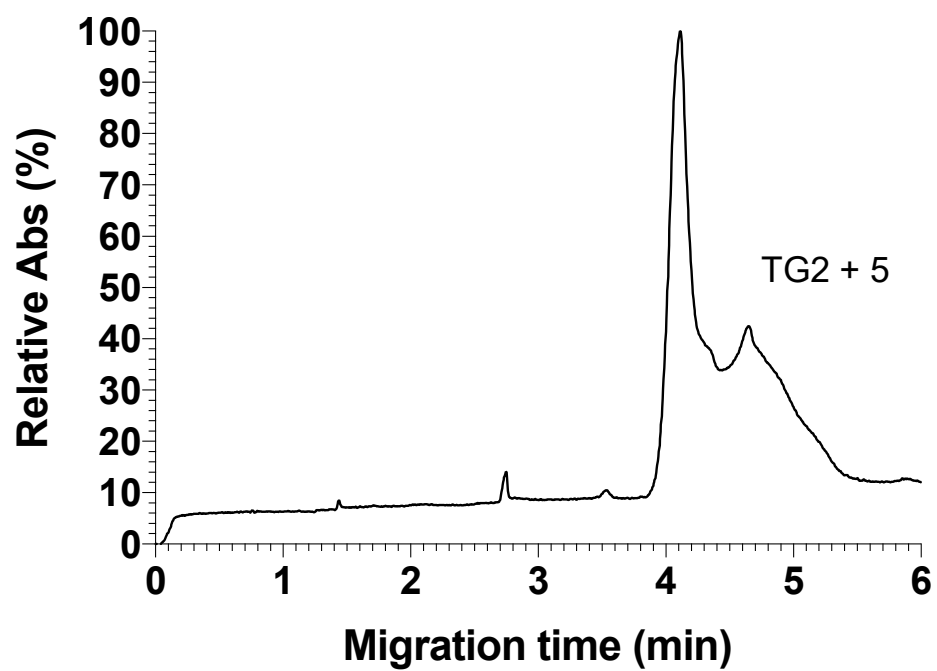

TG2 + inhibitor 7

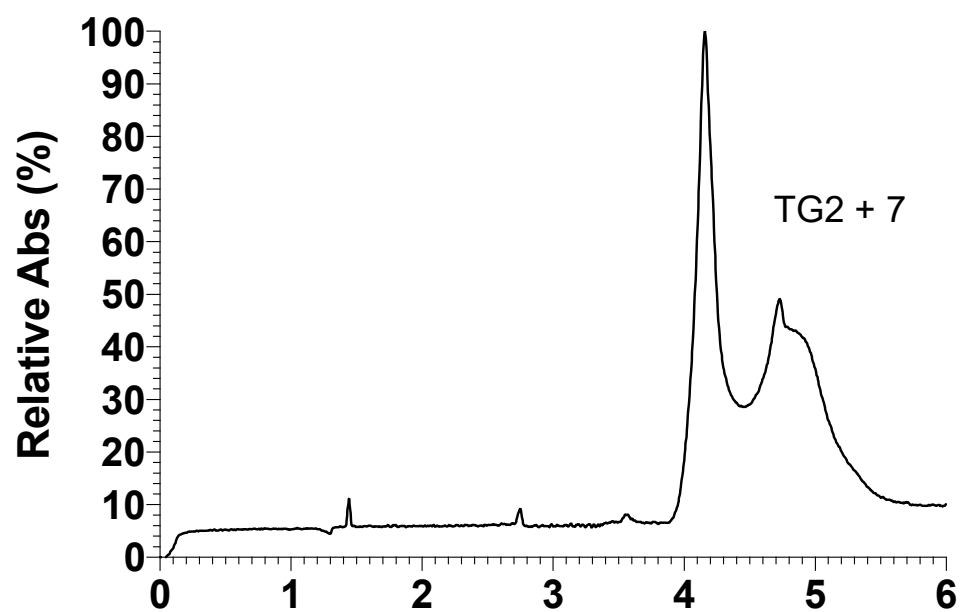

TG2 + inhibitor 8

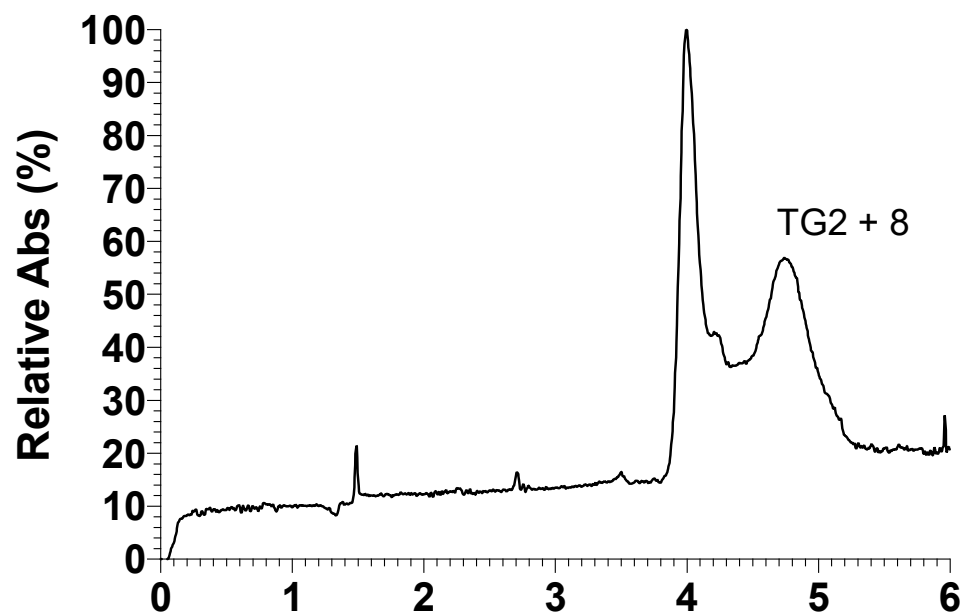

TG2 + Iodoacetamide

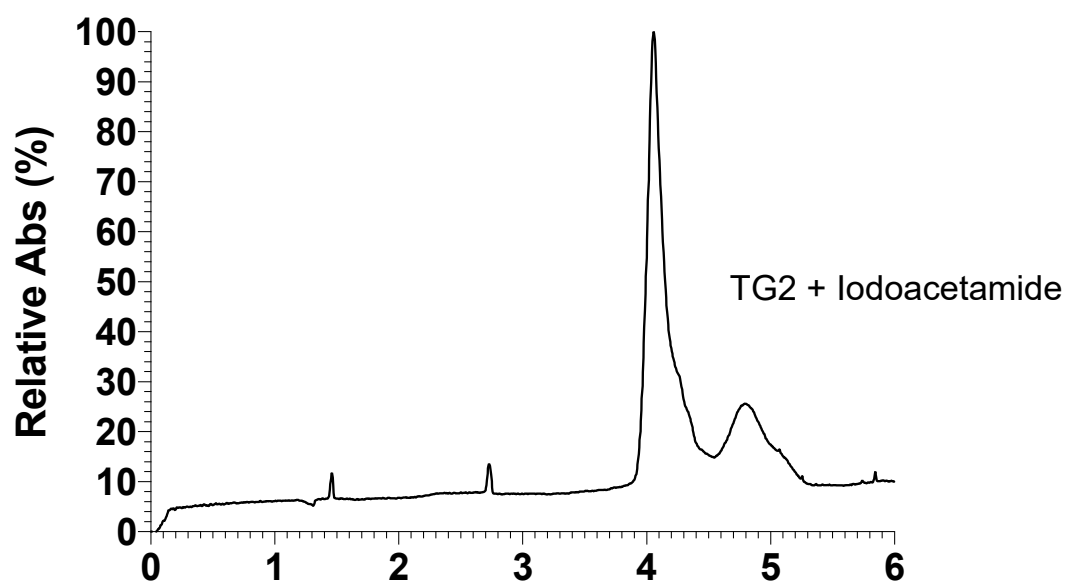

## 6. Kinetic data fitting

### Inhibitor 1\*

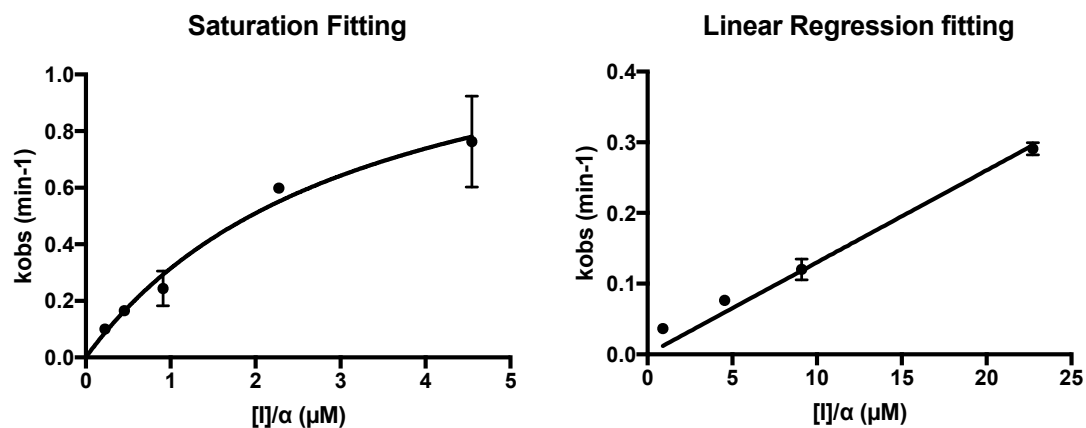

\* Previously reported (*RSC Med. Chem.*, **2022**, *13*, 413-428)

### Inhibitor 2

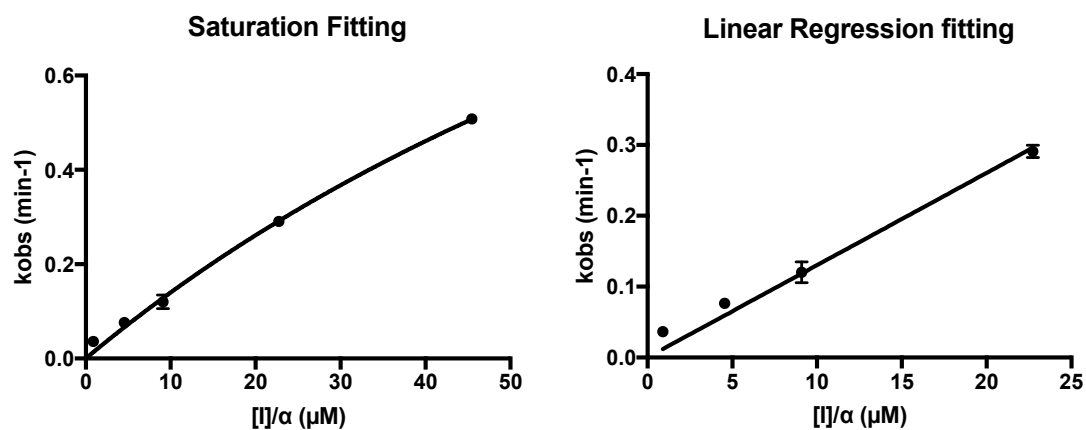

### *Inhibitor 3*

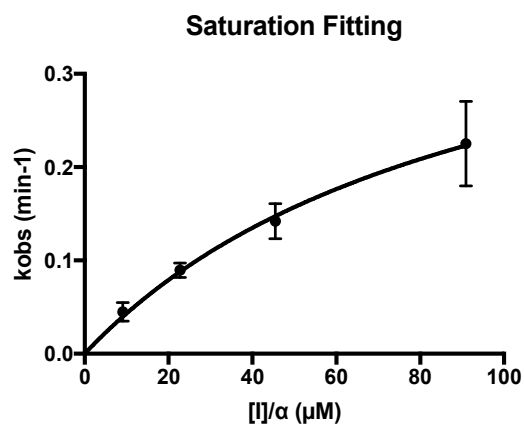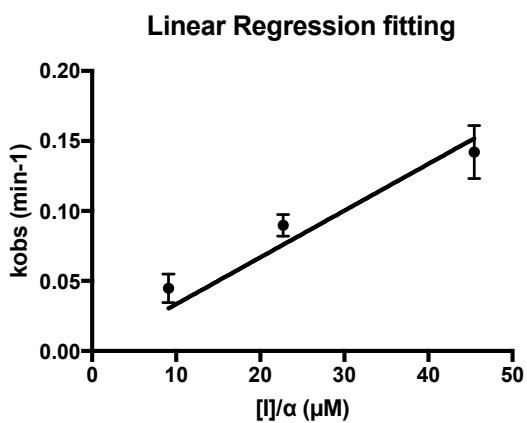

### *Inhibitor 4*

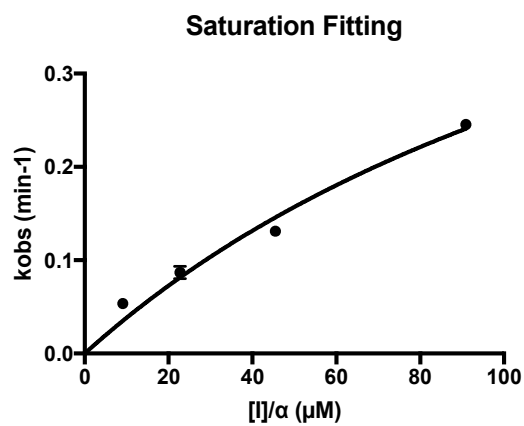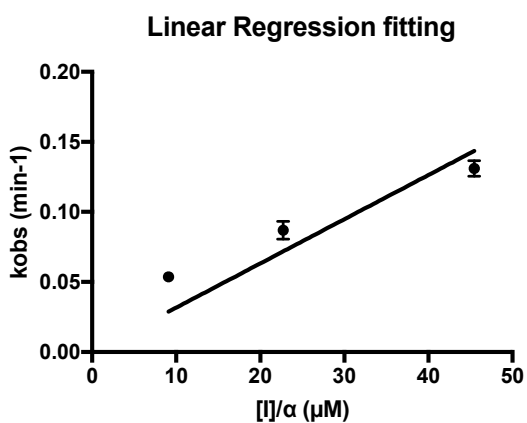

### *Inhibitor 5*

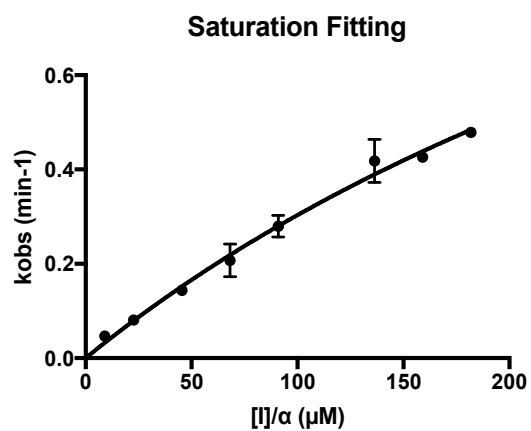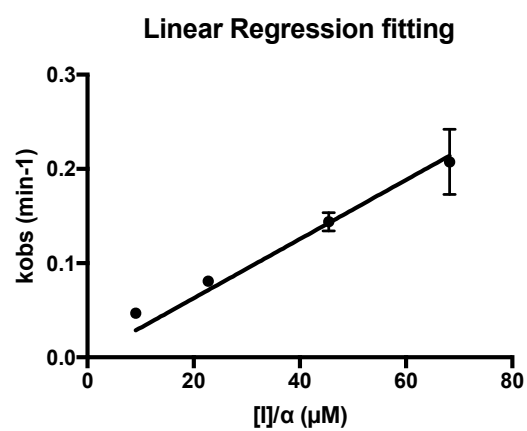

*Inhibitor 6*

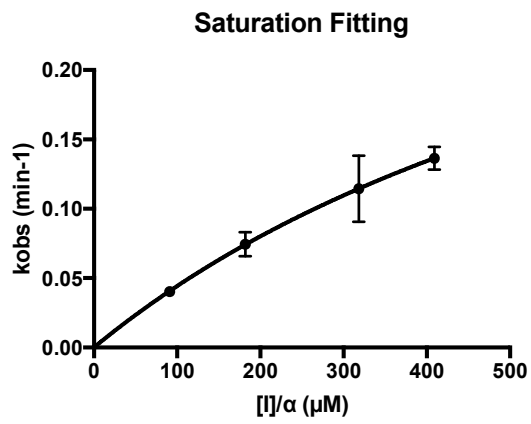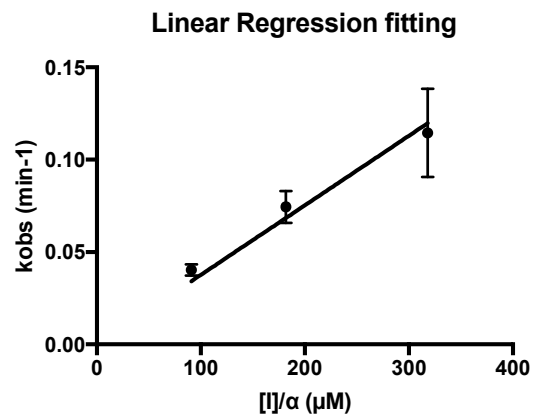

*Inhibitor 7*

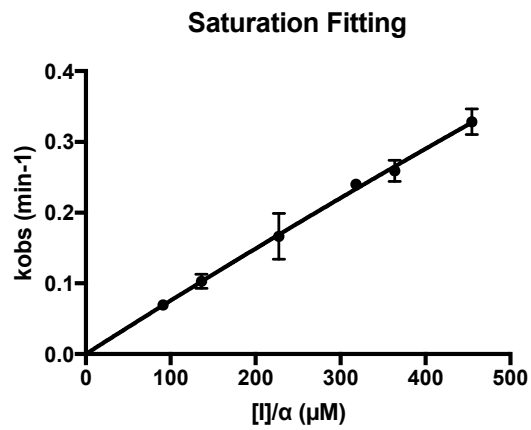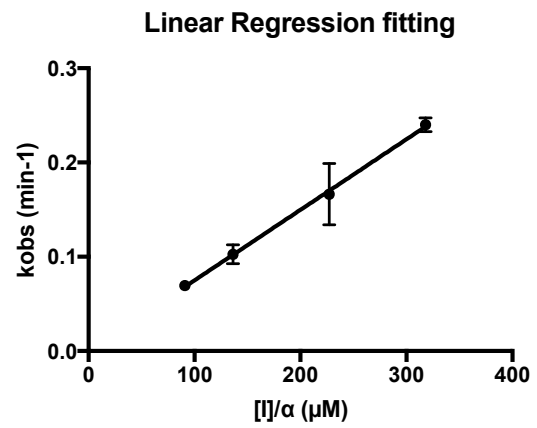

*Inhibitor 8*

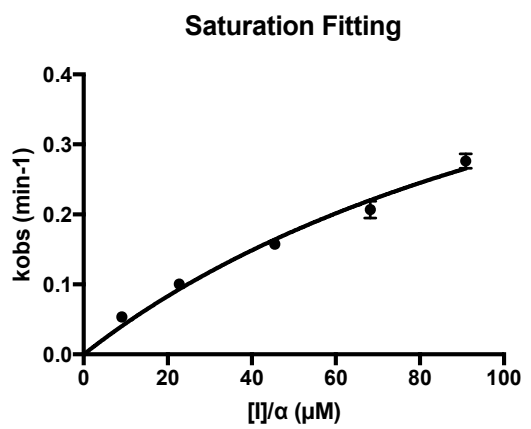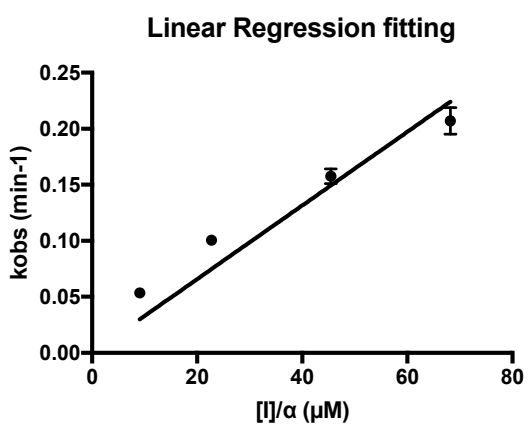

## References

34. Rangaswamy, A.M.M.; Navals, P.; Gates, E.W.J.; Shad, S.; Watt, S.K.I.; Keillor, J.W. Structure–Activity Relationships of Hydrophobic Alkyl Acrylamides as Tissue Transglutaminase Inhibitors. *RSC Med Chem* **2022**, *13*, 413–428, doi:10.1039/D1MD00382H.
44. Glatzel, S.; Badi, N.; Päch, M.; Laschewsky, A.; Lutz, J.-F. Well-Defined Synthetic Polymers with a Protein-like Gelation Behavior in Water. *Chemical Communications* **2010**, *46*, 4517, doi:10.1039/c0cc00038h.
45. Auernheimer, J.; Dahmen, C.; Hersel, U.; Bausch, A.; Kessler, H. Photoswitched Cell Adhesion on Surfaces with RGD Peptides. *J Am Chem Soc* **2005**, *127*, 16107–16110, doi:10.1021/ja053648q.
46. Agha, K.A.; Abo-Dya, N.E.; Ibrahim, T.S.; Abdel-Aal, E.H.; Abdel-Samii, Z.K. N-Acylbenzotriazole: Convenient Approach for Protecting Group-Free Monoacylation of Symmetric Diamines. *Monatshefte für Chemie - Chemical Monthly* **2020**, *151*, 589–598, doi:10.1007/s00706-020-02579-5.
